# Supplementary material for: Volatilome Analyses and In Vitro Antimicrobial Activity of the Essential Oils from Five South African Helichrysum Species
Source: PubMed Central journal article supplement (PMC7397169; doi:10.3390/molecules25143196), 2020-07-13
Supplement: molecules-25-03196-s001.pdf [file molecules-25-03196-s001.pdf]

## Supplementary Materials

### Volatilome Analyses and In Vitro Antimicrobial Activity of the Essential Oils from Five South African *Helichrysum* Species

Table S1. VOC chromatograms of the studied *Helichrysum* spp. with the main compounds.

|                                                                                                                                                                         |                                                                                                                                                                                                                                                                     |
|-------------------------------------------------------------------------------------------------------------------------------------------------------------------------|---------------------------------------------------------------------------------------------------------------------------------------------------------------------------------------------------------------------------------------------------------------------|
| 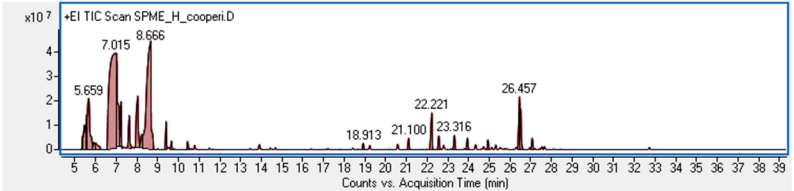 <p>+EI TIC Scan SPME_H_cooperi.D</p> <p>Counts vs. Acquisition Time (min)</p>        | <p><b>A: <i>H. cooperi</i></b></p> <p>5.659: <math>\alpha</math>-pinene<br/>           7.015: sabinene<br/>           8.666: 1,8-cineole<br/>           26.457: <math>\gamma</math>-muurolene</p>                                                                   |
|  <p>+EI TIC Scan SPME_H_edwardsii.D</p> <p>Counts vs. Acquisition Time (min)</p>      | <p><b>B: <i>H. edwardsii</i></b></p> <p>6.571: sabinene<br/>           11.438: trans-thujone<br/>           23.915: <math>\beta</math>-caryophyllene</p>                                                                                                            |
|  <p>+EI TIC Scan SPME_H_pandorifolium.D</p> <p>Counts vs. Acquisition Time (min)</p> | <p><b>C: <i>H. pandorifolium</i></b></p> <p>5.613: <math>\alpha</math>-pinene<br/>           6.751: beta-pinene<br/>           24.003: <math>\beta</math>-caryophyllene<br/>           28.301: <math>\delta</math>-cadinene<br/>           30.766: viridiflorol</p> |
|  <p>+EI TIC Scan SPME_H_trilineatum.D</p> <p>Counts vs. Acquisition Time (min)</p>  | <p><b>D: <i>H. trilineatum</i></b></p> <p>5.643: <math>\alpha</math>-Pinene<br/>           20.571: <math>\delta</math>-elemene<br/>           23.937: <math>\beta</math>-caryophyllene<br/>           26.451: germacrene D</p>                                      |

Table S2: EO chromatograms of the studied *Helichrysum* spp. with the main compounds.

|                                                                                                                                                                     |                                                                                                                                                                                                                                                                              |
|---------------------------------------------------------------------------------------------------------------------------------------------------------------------|------------------------------------------------------------------------------------------------------------------------------------------------------------------------------------------------------------------------------------------------------------------------------|
| 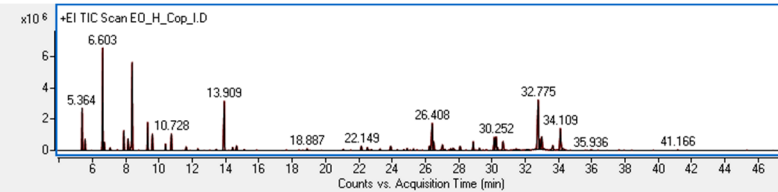 <p>+EI TIC Scan EO_H_Cop_I.D</p> <p>Counts vs. Acquisition Time (min)</p>        | <p><b>A: <i>H. cooperi</i></b></p> <p>5.364: <math>\alpha</math>-thujene<br/>         6.603: sabinene<br/>         13.909: terpinen-4-ol<br/>         26.408: germacrene D<br/>         32.775: himachalol<br/>         34.109: <i>epi</i>-<math>\alpha</math>-bisabolol</p> |
|  <p>+EI TIC Scan EO_D5.SMS.D</p> <p>Counts vs. Acquisition Time (min)</p>         | <p><b>B: <i>H. edwardsii</i></b></p> <p>5.866: sabinene<br/>         10.487: <i>trans</i>-thujone</p>                                                                                                                                                                        |
|  <p>+EI TIC Scan I H.O.SMS.D</p> <p>Counts vs. Acquisition Time (min)</p>         | <p><b>C: <i>H. odoratissimum</i></b></p> <p>4.708: <math>\alpha</math>-pinene<br/>         7.357: 1,8-cineol<br/>         23.144: <math>\beta</math>-caryophyllene<br/>         26.473: <i>epi</i>-cubebol</p>                                                               |
|  <p>+EI TIC Scan EO_H_pandori_I.D</p> <p>Counts vs. Acquisition Time (min)</p>   | <p><b>D: <i>H. pandorifolium</i></b></p> <p>5.564: alpha pinene<br/>         28.153: <math>\delta</math>-cadinene<br/>         31.043: Viridiflorol<br/>         33.040: pogostol</p>                                                                                        |
|  <p>+EI TIC Scan EO_H_trilin_III.D</p> <p>Counts vs. Acquisition Time (min)</p> | <p><b>E: <i>H. trilineatum</i></b></p> <p>5.573: <math>\alpha</math>-pinene<br/>         27.072: bicyclogermacrene<br/>         30.178: spathulenol<br/>         47.112: Abieta-7,13-diene<br/>         51.613: sandaracopimarinol</p>                                       |
